# Supplementary material
Source: publisher figshare collection journal article supplement (https://acs.figshare.com/ndownloader/files/4542139)
Supplement: Supplementary file 1 [file 4542139]

## **Supporting Information**

### **Further studies at neuropeptide S position 5: discovery of novel neuropeptide S receptor antagonists**

Remo Guerrini<sup>§\*</sup>, Valeria Camarda<sup>#</sup>, Claudio Trapella<sup>§</sup>, Girolamo Calo<sup>##</sup>, Anna Rizzi<sup>#</sup>, Chiara Ruzza<sup>#</sup>, Stella Fiorini<sup>§</sup>, Erika Marzola<sup>§</sup>, Rainer K. Reinscheid<sup>¶</sup>, Domenico Regoli<sup>#</sup>,  
and Severo Salvadori<sup>§</sup>.

#### **Table of Contents:**

S2: analytical properties of the [X<sup>5</sup>]NPS analogues

**Table 1.** analytical properties of the [X<sup>5</sup>]NPS analogues

| no        | Abbreviated names                    | <sup>a</sup> t <sub>r</sub> |       | <sup>b</sup> MH <sup>+</sup> |        |
|-----------|--------------------------------------|-----------------------------|-------|------------------------------|--------|
|           |                                      | I                           | II    | calculated                   | found  |
|           | hNPS                                 | 9.59                        | 13.06 | 2188.5                       | 2188.2 |
|           | [D-Val <sup>5</sup> ]hNPS            | 9.92                        | 13.92 | 2230.6                       | 2230.8 |
| <b>1</b>  | [D-Ile <sup>5</sup> ]hNPS            | 8.44                        | 13.84 | 2244.6                       | 2245.6 |
| <b>2</b>  | [D-allo-Ile <sup>5</sup> ]hNPS       | 8.60                        | 13.92 | 2244.6                       | 2244.8 |
| <b>3</b>  | [D-Thr <sup>5</sup> ]hNPS            | 8.03                        | 13.15 | 2232.6                       | 2233.4 |
| <b>4</b>  | [D-allo-Thr <sup>5</sup> ]hNPS       | 7.88                        | 13.30 | 2232.6                       | 2233.4 |
| <b>5</b>  | [D-Nva <sup>5</sup> ]hNPS            | 8.44                        | 13.27 | 2230.6                       | 2231.6 |
| <b>6</b>  | [cyclohexyl-D-Gly <sup>5</sup> ]hNPS | 8.87                        | 14.61 | 2270.7                       | 2271.2 |
| <b>7</b>  | [D-Cha <sup>5</sup> ]hNPS            | 9.62                        | 15.85 | 2284.7                       | 2285.2 |
| <b>8</b>  | [D-Phg <sup>5</sup> ]hNPS            | 8.36                        | 13.91 | 2264.6                       | 2265.2 |
| <b>9</b>  | [tBu-D-Gly <sup>5</sup> ]hNPS        | 8.66                        | 13.16 | 2244.7                       | 2245.2 |
| <b>10</b> | [D-Pen <sup>5</sup> ]hNPS            | 8.41                        | 13.41 | 2260.2                       | 2262.6 |
| <b>11</b> | [tBu-D-Ala <sup>5</sup> ]hNPS        | 8.44                        | 13.62 | 2258.7                       | 2259.6 |

<sup>a</sup>t<sub>r</sub> is the retention time determined by analytical HPLC. Retention time I was obtained using a Nucleodur C<sub>18</sub> column (4.6 x 100 mm, 2 µm particle size) with the solvent system A (10%, v/v, acetonitrile in 0.1% TFA) and solvent system B (60%, v/v, acetonitrile in 0.1% TFA). The column was perfused at a flow rate of 0.6 mL / min using a linear gradient from 0% to 70% B over 25 min. Retention time II was obtained using a Hypersil BDS C<sub>18</sub> column (4.6 x 150 mm, 5 µm particle size) with solvent system A (35 mM NaH<sub>2</sub>PO<sub>4</sub> (pH 2.1)) and solvent system B (59 mM NaH<sub>2</sub>PO<sub>4</sub> (pH 2.1)-acetonitrile (60:40 v/v)). The column was perfused at a flow rate of 1 mL/min with a linear gradient from 5% to 65% B over 25 min

<sup>b</sup>The mass ion (MH<sup>+</sup>) was obtained by electro spray mass spectrometry.
